# Supplementary material for: N-Glycosylation of the SARS-CoV-2 Receptor Binding Domain Is Important for Functional Expression in Plants
Source: Frontiers journal article supplement (doi:10.3389/fpls.2021.689104), 2021-06-15
Supplement: Data_Sheet_1.PDF [file Data_Sheet_1.PDF]

## *Supplementary Material*

### **N-glycosylation of the SARS-CoV-2 receptor binding domain is important for functional expression in plants**

Yun-Ji Shin<sup>1</sup>, Julia König-Beihammer<sup>1</sup>, Ulrike Vavra<sup>1</sup>, Jennifer Schwestka<sup>1</sup>, Nikolaus F. Kienzl<sup>1</sup>, Miriam Klausberger<sup>2</sup>, Elisabeth Laurent<sup>3</sup>, Clemens Grünwald-Gruber<sup>4</sup>, Klemens Vierlinger<sup>5</sup>, Manuela Hofner<sup>5</sup>, Emmanuel Margolin<sup>6,7</sup>, Andreas Weinhäusel<sup>5</sup>, Eva Stöger<sup>1</sup>, Lukas Mach<sup>1</sup>, Richard Strasser<sup>1,\*</sup>

#### **Contents**

**Supplementary Figure 1. Amino acid sequences of the expressed RBD variants.**

**Supplementary Figure 2. Immunoblot analysis of RBD-KDEL co-expressed with human CRT or *Arabidopsis* CNX1.**

**Supplementary Figure 3. Immunoblot analysis of RBD-C538A.**

**Supplementary Figure 4. SEC elution profile of RBD-215.**

**Supplementary Figure 5. MS spectra of the two RBD-215 glycopeptides.**

**Supplementary Figure 6. RBD-215 expression is not affected by co-expression of *Arabidopsis* CRT2 or CNX1.**

**Supplementary Figure 7. Human CRT does not improve the expression of RBD-12Q lacking both N-glycosylation sites.**

**Supplementary Figure 8. MS spectra of the two RBD-215 glycopeptides carrying oligomannosidic N-glycans.**

**Supplementary Table 1. List of primers used in this study.**

**RBD amino acid sequence**

MANKHMSLSL FIVLLGLSCSLASGRVQPTESIVRFP **N**ITNLCPFGGEVF **N**ATRFASVYAWNRKRISN **C**VADYSVL  
 YNSASFSTFK **C**YGVSP TKLNDLCFTNVYADSFVIRGDEVRQIAPGQTGKIADYNYKLPDDFTG **C**VIAWNSNNLD  
 SKVGGNYNYLYRLFRKSNLKPFFERDISTEIQAGSTP **C**NGVEGFN **C**YFPLQSYGFQPTNGVGYQPYRVVLSFE  
 LLHAPATV **C**GP KKSTNLVKNK **C**VNF **HHHHHH**

**RBD-KDEL amino acid sequence**

MANKHMSLSL FIVLLGLSCSLASGRVQPTESIVRFP **N**ITNLCPFGGEVF **N**ATRFASVYAWNRKRISN **C**VADYSVL  
 YNSASFSTFK **C**YGVSP TKLNDLCFTNVYADSFVIRGDEVRQIAPGQTGKIADYNYKLPDDFTG **C**VIAWNSNNLD  
 SKVGGNYNYLYRLFRKSNLKPFFERDISTEIQAGSTP **C**NGVEGFN **C**YFPLQSYGFQPTNGVGYQPYRVVLSFE  
 LLHAPATV **C**GP KKSTNLVKNK **C**VNF **HHHHHH** **KDEL**

**RBD-C538A amino acid sequence**

MANKHMSLSL FIVLLGLSCSLASGRVQPTESIVRFP **N**ITNLCPFGGEVF **N**ATRFASVYAWNRKRISN **C**VADYSVL  
 YNSASFSTFK **C**YGVSP TKLNDLCFTNVYADSFVIRGDEVRQIAPGQTGKIADYNYKLPDDFTG **C**VIAWNSNNLD  
 SKVGGNYNYLYRLFRKSNLKPFFERDISTEIQAGSTP **C**NGVEGFN **C**YFPLQSYGFQPTNGVGYQPYRVVLSFE  
 LLHAPATV **C**GP KKSTNLVKNK **A**VNF **HHHHHH**

**RBD-215 amino acid sequence**

MANKHMSLSL FIVLLGLSCSLASGRVQPTESIVRFP **N**ITNLCPFGGEVF **N**ATRFASVYAWNRKRISN **C**VADYSVL  
 YNSASFSTFK **C**YGVSP TKLNDLCFTNVYADSFVIRGDEVRQIAPGQTGKIADYNYKLPDDFTG **C**VIAWNSNNLD  
 SKVGGNYNYLYRLFRKSNLKPFFERDISTEIQAGSTP **C**NGVEGFN **C**YFPLQSYGFQPTNGVGYQPYRVVLSFE  
 LLHAPATV **C**GP KKSTNL **HHHHHH**

**RBD-215-1Q amino acid sequence (NIT mutated to QIT)**

MANKHMSLSL FIVLLGLSCSLASGRVQPTESIVRFP **Q**ITNLCPFGGEVF **N**ATRFASVYAWNRKRISN **C**VADYSVL  
 YNSASFSTFK **C**YGVSP TKLNDLCFTNVYADSFVIRGDEVRQIAPGQTGKIADYNYKLPDDFTG **C**VIAWNSNNLD  
 SKVGGNYNYLYRLFRKSNLKPFFERDISTEIQAGSTP **C**NGVEGFN **C**YFPLQSYGFQPTNGVGYQPYRVVLSFE  
 LLHAPATV **C**GP KKSTNL **HHHHHH**

**RBD-215-2Q amino acid sequence (NAT mutated to QAT)**

MANKHMSLSL FIVLLGLSCSLASGRVQPTESIVRFP **N**ITNLCPFGGEVF **Q**ATRFASVYAWNRKRISN **C**VADYSVL  
 YNSASFSTFK **C**YGVSP TKLNDLCFTNVYADSFVIRGDEVRQIAPGQTGKIADYNYKLPDDFTG **C**VIAWNSNNLD  
 SKVGGNYNYLYRLFRKSNLKPFFERDISTEIQAGSTP **C**NGVEGFN **C**YFPLQSYGFQPTNGVGYQPYRVVLSFE  
 LLHAPATV **C**GP KKSTNL **HHHHHH**

**RBD-215-12Q amino acid sequence**

MANKHMSLSL FIVLLGLSCSLASGRVQPTESIVRFP **Q**ITNLCPFGGEVF **Q**ATRFASVYAWNRKRISN **C**VADYSVL  
 YNSASFSTFK **C**YGVSP TKLNDLCFTNVYADSFVIRGDEVRQIAPGQTGKIADYNYKLPDDFTG **C**VIAWNSNNLD  
 SKVGGNYNYLYRLFRKSNLKPFFERDISTEIQAGSTP **C**NGVEGFN **C**YFPLQSYGFQPTNGVGYQPYRVVLSFE  
 LLHAPATV **C**GP KKSTNL **HHHHHH**

**Supplementary Figure 1. Amino acid sequences of the expressed RBD variants.** The barley  $\alpha$ -amylase signal peptide is highlighted in magenta. The SARS-CoV-2 RBD domain (amino acids 319 to 541, RVP...VNF, see UniProt entry P0DTC2) has been selected based on recent publications (Amanat *et al.* 2020; Lan *et al.* 2020). The two N-glycosylation consensus sequences are underlined and the Asn residues (N331 and N343) are shown in bold. Cysteine residues are shown in red, the 6x histidine-tag is highlighted in yellow and the KDEL Golgi-to-ER retrieval signal is highlighted in green. In the RBD-215 mutants, Asn residues were exchanged to Gln (highlighted in red) and in RBD-C538A the exchanged amino acid is highlighted in light blue.

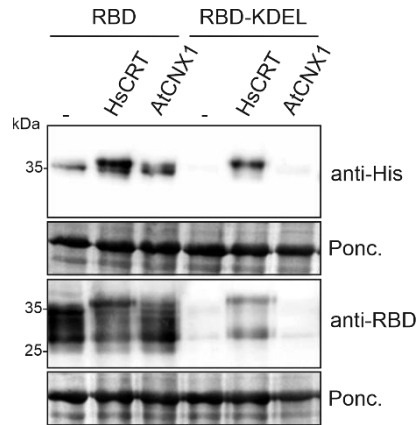

**Supplementary Figure 2. Immunoblot analysis of RBD-KDEL co-expressed with human CRT or *Arabidopsis* CNX1.** RBD-KDEL was transiently co-expressed in *N. benthamiana* with human CRT (HsCRT) or *Arabidopsis* CNX1 (AtCNX1). Proteins were extracted 4 days after infiltration and subjected to SDS-PAGE and immunoblotting with the indicated antibodies. RBD expression was included as a control. Ponceau S staining (Ponc.) is shown as a loading control.

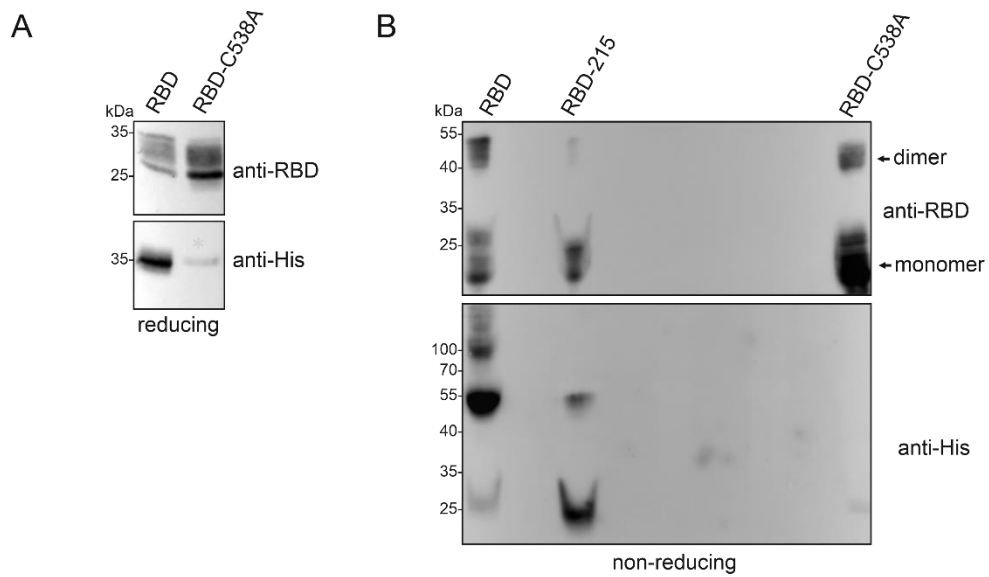

**Supplementary Figure 3. Immunoblot analysis of RBD-C538A.** RBD-C538A was transiently expressed in *N. benthamiana*. Proteins were extracted 4 days after infiltration and subjected to SDS-PAGE under (A) reducing and (B) non-reducing conditions. Expression of RBD and RBD-215 was included as controls.

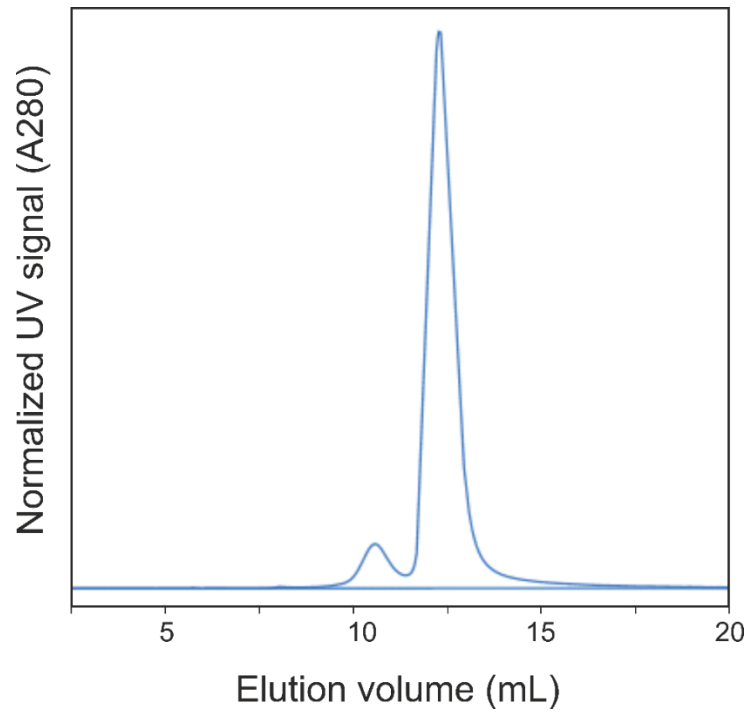

**Supplementary Figure 4. SEC elution profile of RBD-215.** Recombinant RBD-215 was IMAC purified from the apoplast of infiltrated *N. benthamiana* and subjected to SEC. The smaller peak represents the dimeric form.

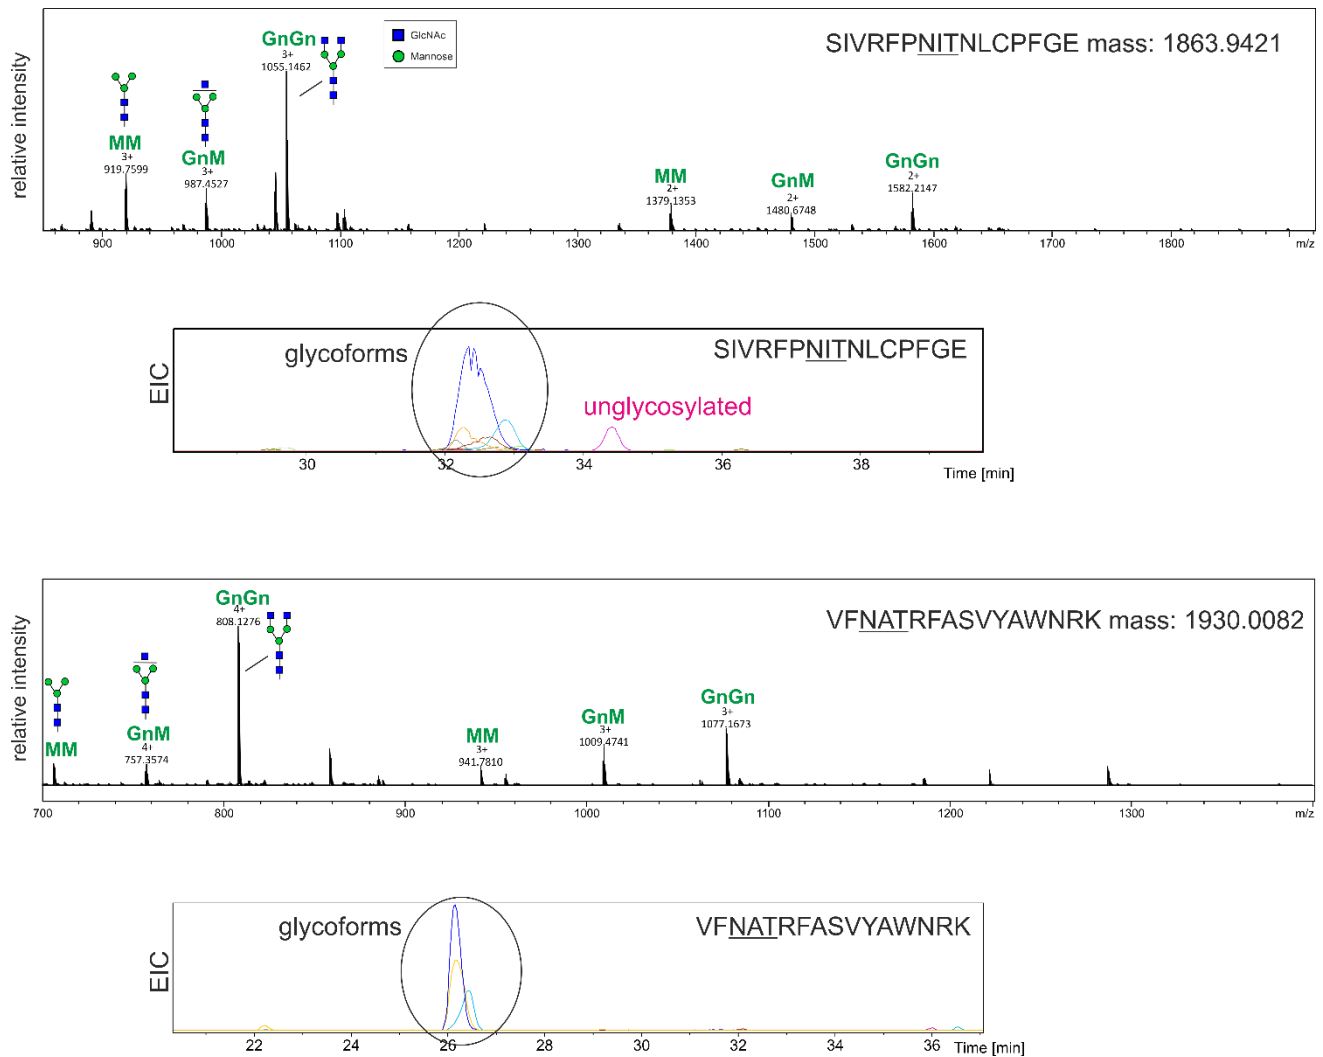

**Supplementary Figure 5. MS spectra of the two RBD-215 glycopeptides.** RBD-215 was purified by IMAC from the apoplastic fluid 4 days after infiltration. Purified RBD-215 was LysC and GluC digested and analysed by MS. The glycopeptides SIVRFPNITNLCPFGE (carrying N331) and VFNATRFASVYAWNRK (carrying N343) are shown. The assigned N-glycans are illustrated with cartoon presentations. The extracted ion chromatograms (EIC) of the most abundant glycopeptides and the non-glycosylated peptides carrying N-glycosylation sites N331 and N343 are shown.

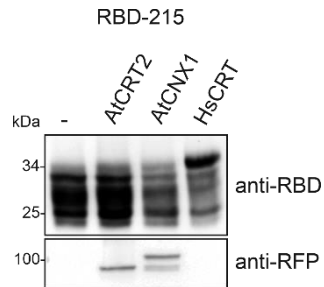

**Supplementary Figure 6. RBD-215 expression is not affected by co-expression of *Arabidopsis* CRT2 or CNX1.** (A) RBD-215 was co-expressed with *Arabidopsis* CRT2 (fused to RFP, AtCRT2), *Arabidopsis* CNX1 (fused to RFP, AtCNX1) or HsCRT.

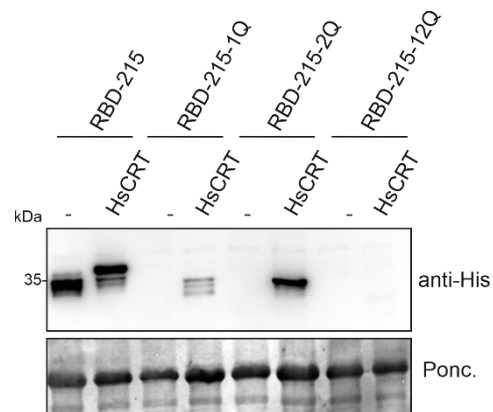

**Supplementary Figure 7. Human CRT does not improve the expression of RBD-215-12Q lacking both N-glycosylation sites.** RBD-215-12Q was expressed in the presence or absence of human CRT (HsCRT). Proteins were extracted 4 days after infiltration and subjected to immunoblotting. RBD-215, RBD-215-1Q and RBD-215-2Q were included as controls. Ponceau S staining (Ponc.) is shown as a loading control.



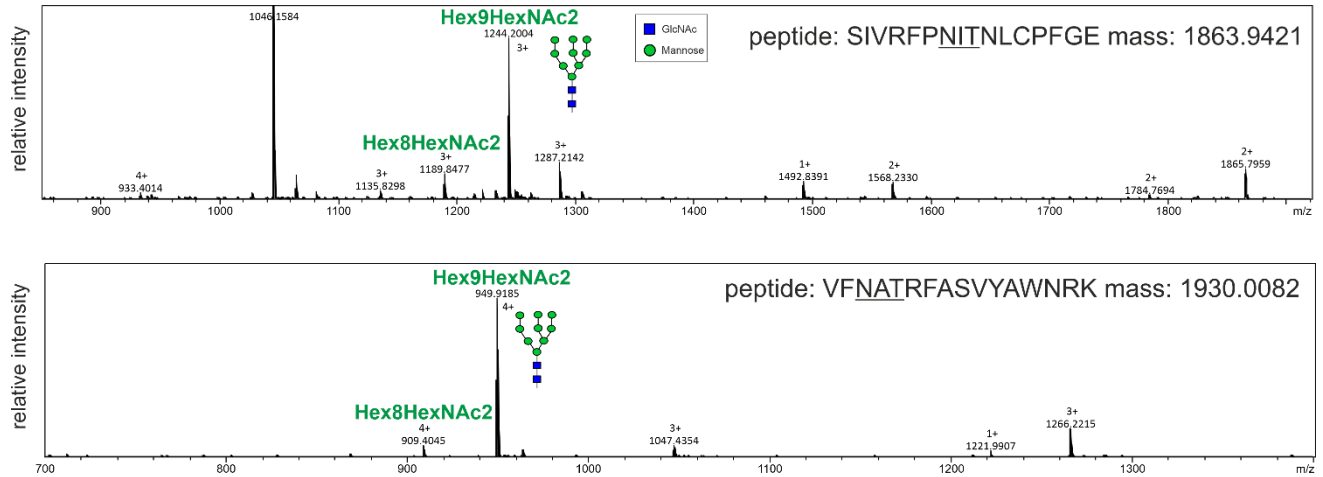

**Supplementary Figure 8. MS spectra of the two RBD-215 glycopeptides carrying oligomannosidic N-glycans.** RBD-215 was co-infiltrated with kifunensine and purified 3 days after infiltration from the apoplastic fluid. Purified RBD-215 was LysC and GluC digested and analysed by MS. The glycopeptides SIVRFPNITNLCPFGE (carrying N331) and VFNATRFASVYAWNPK (carrying N343) are shown. In each spectrum, the most prominent N-glycan peak is illustrated with a cartoon presentation.

**Supplementary Table 1. List of primers used in this study.**

| Name          | Sequence (5' – 3')                                           |
|---------------|--------------------------------------------------------------|
| STRINGS-7F    | CTTCCGGCTCGTTTGACCGGTATG                                     |
| STRINGS-8R    | AAAAACCCTGGCGCTCGAG                                          |
| RBD-3F        | TATATCTAGAATGGCCAACAAGCACATGAG                               |
| RBD-5R        | TATAGGATCCGAAGTTCACGCACTTGTCTT                               |
| RBD-6R        | TATACTCGAGCTACAGTTCGTCCTTGTGGTGGTGATGGTGATGGA                |
| RBD-7R        | TATACTCGAGCTAGTGGTGGTGATGGTGATGGAAGTTCACGGCCTTGT<br>TCTTGAC  |
| RBD-9R        | TATACTCGAGCTAGTGGTGGTGATGGTGATGACCCAGGTTGGTAGACT<br>TCTTAGGA |
| At1g09210-11F | TATAACCGGTATGGCGAAAATGATTCCTAGCC                             |
| At1g09210-12R | TATACTCGAGCTATAGCTCATCATGAGCGGTGGCG                          |
| CNX1-10F      | TATATCTAGAGACGATCAAACGGTTCTGTATG                             |
| CNX1-11R      | TATAGGATCCCTAATTATCACGTCTCGGTTGCC                            |
| PDI5-3F       | TATATCTAGAGAAGAGACGGAGACGAAGGAG                              |
| PDI5-4R       | TATAGGATCCTCAGAGCTCATCCTTGACTTCC                             |
| AtCDC48-3F    | TATAACTAGTTCTACCCAGCTGAATCTTCAGAC                            |
| AtCDC48-6R    | TTATAGTCGACCTAATTGTAGAGATCATCATCGTC                          |
| CRT3-3F       | TATATCTAGAATGGGATTACCTCAAATAAGCTC                            |
| CRT3-4R       | TATAGGATCCGTAATCATCCATATAATCACGTGGA                          |
